# Supplementary material for: Halogen-free ionic liquids as high performance extractants for phenols separation
Source: Royal Society of Chemistry journal article supplement (doi:10.1039/d1ra03415d), 2021-01-01
Supplement: d1ra03415d1.pdf [file d1ra03415d1.pdf]

## Supporting Information

### **Halogen-free ionic liquids as high performance extractants for phenols separation**

Yufeng Yang<sup>a</sup>, Qing Liu<sup>b</sup>, Aibing Chen<sup>a</sup>, Youan Ji<sup>a,\*</sup>

*<sup>a</sup> College of Chemical and Pharmaceutical Engineering, Hebei University of Science and  
Technology, Shijiazhuang 050018, China*

*<sup>b</sup> Division of Materials Science and Chemical Engineering, Yokohama National University,  
Yokohama 240-8501, Japan*

\*Corresponding author

*Email address: jiyouan@126.com; Tel./Fax: +86 311 88632183*

### **List of table captions**

**Table S1** Chemical materials used in this study.

**Table S2** The amount of phenol dissolved in HFILs during separation.

**Table S3** Comparison of this method with other methods.

### **List of figure captions**

**Fig. S1** Results of *n*-hexane phase analysis by GC.

**Fig. S2** Phenol content in oil as a function of water to [Emim][Ac] mole ratio.

Conditions: initial phenol content, 103.22 g·dm<sup>-3</sup>; temperature, 298.2 K; separation time, 20 min.

**Table S1** Chemical materials used in this study.

| Chemical name        | CAS number  | Purity <sup>a</sup> | Supplier                                                      |
|----------------------|-------------|---------------------|---------------------------------------------------------------|
| phenol               | 108-95-2    | 99%                 | Aladdin Chemical Co., Ltd.,<br>Shanghai, China                |
| toluene              | 108-88-3    | 98%                 | Beijing Tongguang Fine Chemicals<br>Co., Ltd., Beijing, China |
| <i>o</i> -cresol     | 95-48-7     | 98%                 | Aladdin Chemical Co., Ltd.,<br>Shanghai, China                |
| <i>m</i> -cresol     | 108-39-4    | 98%                 | Aladdin Chemical Co., Ltd.,<br>Shanghai, China                |
| 1,3-dihydroxybenzene | 108-46-3    | 99%                 | Aladdin Chemical Co., Ltd.,<br>Shanghai, China                |
| [Emim][LLac]         | 878132-19-5 | 98%                 | Shanghai Cheng Jie Chemical Co.,<br>Ltd., Shanghai, China     |
| [Emim][Ac]           | 143314-17-4 | 98%                 | Shanghai Cheng Jie Chemical Co.,<br>Ltd., Shanghai, China     |
| [Bmim][DMP]          | 891772-94-4 | 98%                 | Shanghai Cheng Jie Chemical Co.,<br>Ltd., Shanghai, China     |
| [Emim][ES]           | 342573-75-5 | 98%                 | Shanghai Cheng Jie Chemical Co.,<br>Ltd., Shanghai, China     |
| [Emim][TFMS]         | 145022-44-2 | 98%                 | Shanghai Cheng Jie Chemical Co.,<br>Ltd., Shanghai, China     |
| <i>n</i> -hexane     | 110-54-3    | 98%                 | Beijing Tongguang Fine Chemicals<br>Co., Ltd., Beijing, China |
| diethyl ether        | 60-29-7     | 98%                 | Beijing Tongguang Fine Chemicals<br>Co., Ltd., Beijing, China |

<sup>a</sup> The purities of the chemicals are provided by the suppliers.

**Table S2** The amount of phenol dissolved in HFILs during separation.

|                                      |       |       |       |       |       |       |       |       |       |
|--------------------------------------|-------|-------|-------|-------|-------|-------|-------|-------|-------|
| Mole ratio of [Emim][LLac] to phenol | 0.11  | 0.20  | 0.30  | 0.40  | 0.49  | 0.61  | 0.70  | 0.79  | 0.95  |
| Amount of phenol dissolved/g         | 0.434 | 1.030 | 1.442 | 1.760 | 1.925 | 1.966 | 1.987 | 2.001 | 2.022 |
| Mole ratio of [Emim][Ac] to phenol   | 0.11  | 0.22  | 0.30  | 0.43  | 0.52  | 0.61  | 0.70  | 0.83  | 1.01  |
| Amount of phenol dissolved/g         | 0.343 | 0.863 | 1.290 | 1.736 | 1.930 | 1.993 | 2.006 | 2.018 | 2.028 |

**Table S3** Comparison of this method with other methods.

| Separation agents     | $C_0/\text{g}\cdot\text{dm}^{-3}$ | $SE$  | $\text{MUCP}/\text{g}\cdot\text{dm}^{-3}$ |
|-----------------------|-----------------------------------|-------|-------------------------------------------|
| [Emim][Ac]            | 103.215                           | 98.6% | 1.96                                      |
| ChCl <sup>a</sup>     | 97.67                             | 90%   | 8.89                                      |
| DIL <sup>b</sup>      | 100                               | 96.6% | 3.90                                      |
| [Bmim]Cl <sup>c</sup> | 100                               | 98.5% | 1.2                                       |
| Amide compounds       | 200.67                            | 97.0% | -                                         |
| L-car <sup>d</sup>    | 105                               | 94.6% | 14                                        |
| Amino acid ILs        | 100                               | 99.0% | 1.40                                      |

<sup>a</sup> Choline chloride, a kind of quaternary ammonium salt.

<sup>b</sup> Imidazolium-based dicationic ionic liquids, separating phenol via forming deep eutectic solvents.

<sup>c</sup> 1-Butyl-3-methylimidazolium chloride.

<sup>d</sup> L-carnitine, a kind of inner salt.

**Table S4** Comparison of this method with other methods.

| Chemicals    | Frequency/cm <sup>-1</sup>       | Functional group                           | Assignment           |
|--------------|----------------------------------|--------------------------------------------|----------------------|
| Phenol       | 3322                             | -OH                                        | stretching vibration |
|              | 3021                             | C-H in benzene ring                        | stretching vibration |
|              | 1335                             | -OH                                        | bending vibration    |
|              | 1234                             | C-O                                        | stretching vibration |
| [Emim][LLac] | 3452                             | C=O                                        | stretching vibration |
|              | 3412 (overlapping peak)          | -OH                                        | stretching vibration |
|              | 3111                             | C-H in imidazole ring                      | stretching vibration |
|              | 2700-3000                        | C-H in CH <sub>3</sub> and CH <sub>2</sub> | stretching vibration |
|              | 1643 (overlapping peak) and 1416 | -COO-                                      | stretching vibration |
|              | 1589                             | imidazole ring                             | skeleton vibration   |
|              | 1456                             | C-H in CH <sub>3</sub>                     | bending vibration    |
|              | 1172                             | imidazole ring                             | stretching vibration |
| 500-1000     | C-H                              | in-plane bending vibration                 |                      |
| [Emim][Ac]   | 3437                             | C=O                                        | stretching vibration |
|              | 3111                             | C-H in imidazole ring                      | stretching vibration |
|              | 2700-3000                        | C-H in CH <sub>3</sub> and CH <sub>2</sub> | stretching vibration |
|              | 1654 (overlapping)               | -COO-                                      | stretching vibration |

|                         |                |                        |                            |
|-------------------------|----------------|------------------------|----------------------------|
|                         | peak) and 1402 |                        |                            |
|                         | 1572           | imidazole ring         | skeleton vibration         |
|                         | 1452           | C-H in CH <sub>3</sub> | bending vibration          |
|                         | 1169           | imidazole ring         | stretching vibration       |
|                         | 500-1000       | C-H                    | in-plane bending vibration |
| [Emim][LLac]<br>+phenol | about 3200     | -OH in phenol          | stretching vibration       |
| [Emim][Ac]<br>+phenol   | 3111           | -OH in phenol          | stretching vibration       |

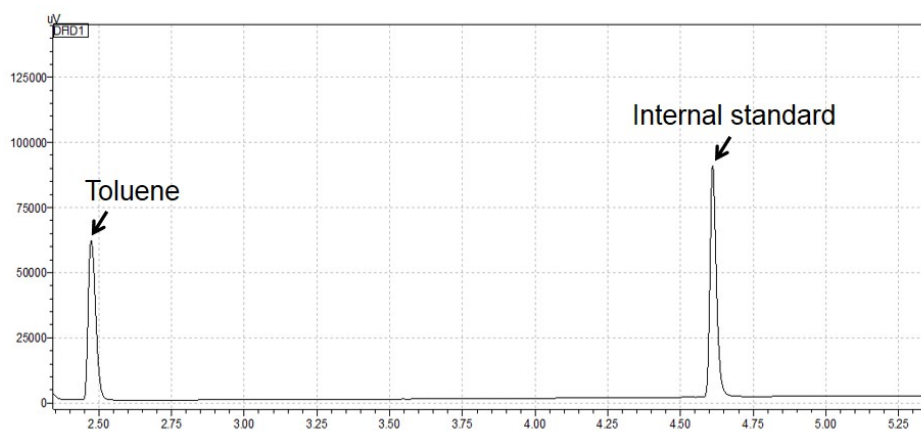

**Fig. S1** Results of *n*-hexane phase analysis by GC.

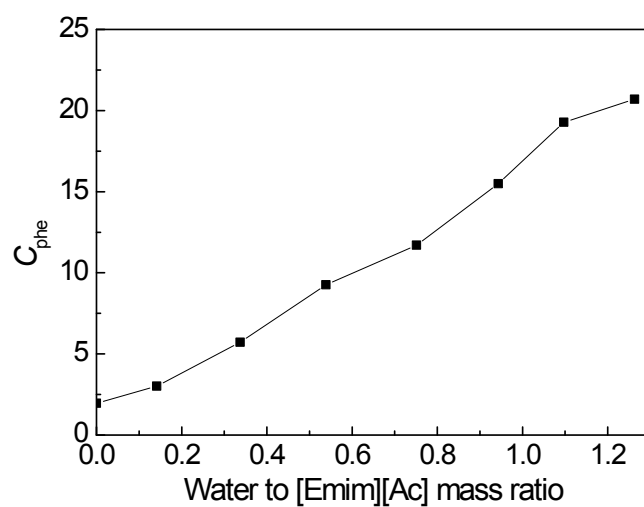

**Fig. S2** Phenol content in oil as a function of water to [Emim][Ac] mass ratio. Conditions: initial phenol content,  $103.22 \text{ g}\cdot\text{dm}^{-3}$ ; temperature,  $298.2 \text{ K}$ ; separation time,  $20 \text{ min}$ .
